# Supplementary material
Source: publisher figshare collection journal article supplement (https://karger.figshare.com/ndownloader/files/8708398)
Supplement: Supplementary file 1 [file 8708398]

Table 1

Summary of the cases in the literature manifesting isolated oculomotor nerve palsy  
associated with CSS

| authors                            | age/sex | pupil         | associated symptoms                    | MRI findings        | course                 |
|------------------------------------|---------|---------------|----------------------------------------|---------------------|------------------------|
| Abe-Matsushita et al <sup>10</sup> | 34/M    | not described | skin lesions                           | not examined        | not described          |
| Shintani et al <sup>11</sup>       | 62/F    | involved      | peripheral neuropathy<br>headache      | no abnormality      | resolved by<br>steroid |
| Tsuda et al <sup>12</sup>          | 30/M    | involved      | no                                     | midbrain infarction | resolved by<br>steroid |
| Naitoh <sup>13</sup>               | 74/M    | involved      | peripheral neuropathy                  | not examined        | resolved by<br>steroid |
| present case                       | 57/M    | involved      | peripheral neuropathy,<br>pericarditis | no abnormality      | resolved by<br>steroid |
